# Supplementary material for: Lanthanum(Ⅲ)-amino Acid Chelate Mitigates Copper(Ⅱ) Stress in Rice (Oryza Sativa)
Source: Research Square preprint supplement (doi:10.21203/rs.3.rs-499369/v1), 2021-05-17
Supplement: Supplementary file 1 [file 8b7cdb4ebc3eefee20b87d86.docx]

Lanthanum(Ⅲ)-amino acid chelate mitigates Copper(Ⅱ) stress in rice (*Oryza sativa*)

Jiajia Chena,*, Yuqing Zhonga

a School of Chemistry and Life Sciences, Suzhou University of Science and Technology, No.1 Kerui Road, Suzhou 215011, China.

*Corresponding author at: School of Chemistry and Life Sciences, Suzhou University of Science and Technology, 215011 Jiajia Chen, Suzhou, China.

E-mail address: [njucjj@126.com](mailto:njucjj@126.com).

Tel: 86-13912634686

Fax: 86-512-68418438

Online Resource 1 Parameter setting of orthogonal design

| Level | Factor | | | |
| --- | --- | --- | --- | --- |
| Temperature (°C) | Time (h) | Mole ratio | pH |
| 1 | 50 | 3 | 1:1.0 | 6 |
| 2 | 60 | 4 | 1:1.5 | 7 |
| 3 | 70 | 5 | 1:2.0 | 8 |
